# Supplementary material
Source: Research Square preprint supplement (doi:10.21203/rs.3.rs-10125764/v1)
Supplement: Supplementary file 1 [file fe1807c1d9180c8d8c5b6761.docx]

**Robustness Tests of Core Technology Node Screening Thresholds**

**1 Purpose of the Tests and the Need for Data Screening**

This study focuses on technologies in the low-altitude economy. It constructs cross-period technological association networks from patent co-occurrence relationships and further examines the mechanisms underlying tie formation and cross-period persistence. The low-altitude economy is technology-intensive, highly interdisciplinary, and characterized by long industrial chains, making patent data and technology-network methods suitable for identifying the relational structure among core technologies [1]. If all raw technology codes are retained and every single co-occurrence is treated as a valid edge, network size grows combinatorially with the number of technology nodes. For an undirected technology network containing n nodes, the number of potential technological ties is n(n-1)/2. Consequently, even a small number of low-frequency, short-lived, or incidental technology nodes can substantially expand the risk set and fill the binary relational matrix with numerous accidental weak ties [2]. Although such ties broaden network coverage, their relational strength and cross-period stability are limited, which may weaken the model's ability to identify persistent technological coordination [3]. Moderate screening of technology nodes and ties is therefore necessary during network construction to reduce interference from incidental co-occurrence in network structure and model estimation [4].

Accordingly, this study draws on prior research on technological convergence and evolution that constructs IPC co-occurrence networks within time windows and retains important technological relationships through co-occurrence-frequency thresholds [5]. Considering the sample size and cross-period comparability requirements of the core technology network in the low-altitude economy, three data-screening criteria are imposed during network construction. First, a technology must appear at least 40 times in total, thereby excluding peripheral technologies that occur only incidentally and lack representativeness. Second, a technology must be present in at least four observation periods, thereby retaining nodes with persistent cross-period innovation relevance. Third, a technology pair is coded as a valid edge (1) only when the two technologies co-occur at least three times within a period; otherwise, it is coded as 0. The first two criteria screen technology nodes, whereas the third determines the binarization of edge relationships. Constructing technology co-occurrence relationships from patent classification codes and screening nodes, node dynamics, and co-occurrence relationships according to the research purpose are common practices in patent technology-network and technological-convergence prediction studies [6].

To test whether these three settings alter the model's mechanism-level conclusions, this study constructs comparison groups using a controlled-variable design. The main-specification group serves as the reference, and only one screening criterion is changed in each test while all remaining criteria are held constant. An unrestricted raw-data group is also included to examine the information reflected by the complete dataset and the boundary changes that occur when all three criteria are removed simultaneously [7]. This design separately identifies the effects of the total-frequency threshold, the minimum number of active periods, and the edge-binarization threshold on the model results, avoiding the mistaken attribution of differences caused by simultaneous changes in multiple settings to any single criterion.

**2 Testing Principles and Decision Criteria**

This study uses average marginal effect-based two one-sided tests (AME-TOST) to compare the practical differences in the effects of each mechanism across alternative settings. An average marginal effect represents the average change in the probability of tie formation or tie persistence associated with a change in a mechanism variable. Compared with direct comparisons of regression coefficients, AMEs express the practical effect of a mechanism on relational probabilities and are therefore more suitable for comparisons across different network sizes, risk sets, and edge-threshold settings [8]. By translating coefficients from nonlinear models into effects on outcome probabilities, AMEs enable interpretable comparisons across sample boundaries and model specifications [9].

Because AMEs are interpreted on the probability scale of tie formation or tie persistence, differences in AMEs can be interpreted as changes in the probabilistic influence of a mechanism [10]. Following equivalence-testing approaches that define the maximum acceptable substantive-difference bound in advance [11], and drawing on effect-size research concerning the magnitude of practically meaningful differences, this study sets ±0.10 as the maximum acceptable equivalence bound [12]. In equivalence testing, the two one-sided tests procedure typically evaluates whether the relevant confidence interval lies entirely within a prespecified equivalence interval [13]. The significance level is set at 0.05. Under the TOST logic, when α = 0.05, equivalence can be assessed by determining whether the 90% confidence interval of the estimated difference lies fully within the prespecified equivalence bounds [14]. Accordingly, a mechanism is judged to pass the equivalence test when the AME-TOST p-value is below 0.05 and the 90% confidence interval of ΔAME lies entirely within [-0.10, 0.10]. The p-values in the tables are reported in scientific notation only to show the order of magnitude of extremely small values; this does not change their comparison with the 0.05 significance level.

To avoid treating coefficient fluctuations near zero or lacking sufficient statistical support as changes in mechanism direction, statistical inference should not rely solely on a single p-value or significance label; effect magnitude and estimation uncertainty must also be considered [15]. This study therefore jointly examines coefficient signs, absolute coefficient magnitudes, significance levels, and the magnitude of between-setting differences. A mechanism is judged to exhibit a substantive sign reversal only when coefficients in both settings have non-trivial magnitudes and statistical support, have opposite signs, and differ by more than a prespecified threshold [16]. Let the coefficient for a mechanism in the main-specification group be β_baseline and that in the comparison group be β_comparison, with Δβ = β_comparison - β_baseline. Drawing primarily on Cohen's conventional effect-size thresholds [12] and the recommendation that effect reporting consider statistical significance, effect magnitude, and practical relevance simultaneously [17], this study uses 0.20 and 0.50 as reference magnitudes for non-trivial and medium-sized effects and formulates operational criteria on the standardized-coefficient scale. A substantive sign reversal is recorded only when |β_baseline| ≥ 0.20, p_baseline < 0.10, |β_comparison| ≥ 0.20, p_comparison < 0.10, |Δβ| > 0.50, and β_baseline and β_comparison have opposite signs. If these conditions are not all met, a slight sign change is not treated as substantive. This procedure prevents near-zero estimates, statistically unsupported fluctuations, or limited differences from being misclassified as changes in mechanism direction.

**3 Detailed Test Results**

Table 1. Group Settings for the Controlled-Variable Tests of the Three Screening Criteria

| **Group** | **Total-frequency threshold** | **Minimum active periods** | **Edge threshold** | **Description** |
| --- | --- | --- | --- | --- |
| Unscreened raw-data group | No threshold | No threshold | ≥1 | No total-frequency or minimum-active-period threshold is imposed; an edge is recorded for at least one co-occurrence. This group serves as the unrestricted boundary comparison. |
| Main-specification group | 40 | 4 | ≥3 | Main model specification: a technology appears at least 40 times, is active in at least four periods, and an edge is recorded for at least three co-occurrences. |
| Frequency-control group | No threshold | 4 | ≥3 | Only the total-frequency threshold is removed; the minimum of four active periods and the edge threshold of at least three co-occurrences are retained. |
| Active-period control group | 40 | No threshold | ≥3 | Only the minimum-active-period threshold is removed; the total-frequency threshold of 40 and the edge threshold of at least three co-occurrences are retained. |
| Edge-threshold control group | 40 | 4 | ≥1 | The node-screening criteria are retained, while the edge threshold is relaxed from at least three co-occurrences to at least one. |

Table 2. Frequency-Criterion Test: Detailed Results for the Main-Specification and Frequency-Control Groups

| **Process** | **Mechanism** | **Baseline AME** | **Comparison AME** | **ΔAME** | **90% confidence interval** | **p-value** | **Decision** |
| --- | --- | --- | --- | --- | --- | --- | --- |
| Tie formation | Local closure | -0.0008 | 0.0002 | 0.0009 | [0.00093, 0.00096]⊂ [-0.10, 0.10] | 5.30e-25028671 (<0.001) | Pass |
| Tie formation | Centrality level | 0.0291 | 0.0183 | -0.0108 | [-0.01148, -0.01018]⊂ [-0.10, 0.10] | 1.24e-11052 (<0.001) | Pass |
| Tie formation | Centrality difference | -0.0013 | 0.0033 | 0.0046 | [0.00450, 0.00464]⊂ [-0.10, 0.10] | 7.65e-1203428 (<0.001) | Pass |
| Tie formation | Technological scale level | -0.0067 | 0.0013 | 0.0080 | [0.00787, 0.00813]⊂ [-0.10, 0.10] | 2.46e-295822 (<0.001) | Pass |
| Tie formation | Technological scale difference | 0.0145 | 0.0024 | -0.0122 | [-0.01244, -0.01189]⊂ [-0.10, 0.10] | 8.76e-58655 (<0.001) | Pass |
| Tie formation | Technological proximity | 0.0131 | 0.0078 | -0.0053 | [-0.00557, -0.00499]⊂ [-0.10, 0.10] | 5.83e-63662 (<0.001) | Pass |
| Tie formation | Historical ties | 0.0279 | 0.0181 | -0.0098 | [-0.01041, -0.00915]⊂ [-0.10, 0.10] | 4.30e-12046 (<0.001) | Pass |
| Tie persistence | Local closure | 0.0000 | 0.0075 | 0.0075 | [0.00721, 0.00777]⊂ [-0.10, 0.10] | 2.31e-63552 (<0.001) | Pass |
| Tie persistence | Centrality level | 0.1042 | 0.1009 | -0.0033 | [-0.00892, 0.00240]⊂ [-0.10, 0.10] | 2.55e-174 (<0.001) | Pass |
| Tie persistence | Centrality difference | -0.0582 | -0.0381 | 0.0201 | [0.01732, 0.02282]⊂ [-0.10, 0.10] | 3.26e-499 (<0.001) | Pass |
| Tie persistence | Technological scale level | -0.0564 | -0.0520 | 0.0045 | [0.00148, 0.00748]⊂ [-0.10, 0.10] | 2.15e-599 (<0.001) | Pass |
| Tie persistence | Technological scale difference | 0.0746 | 0.0550 | -0.0197 | [-0.02333, -0.01603]⊂ [-0.10, 0.10] | 2.43e-287 (<0.001) | Pass |
| Tie persistence | Technological proximity | -0.0049 | -0.0030 | 0.0019 | [0.00170, 0.00216]⊂ [-0.10, 0.10] | 3.59e-108151 (<0.001) | Pass |
| Tie persistence | Historical ties | 0.0813 | 0.0829 | 0.0016 | [-0.00290, 0.00614]⊂ [-0.10, 0.10] | 8.37e-281 (<0.001) | Pass |

Table 3. Active-Period Criterion Test: Detailed Results for the Main-Specification and Period-Control Groups

| **Process** | **Mechanism** | **Baseline AME** | **Comparison AME** | **ΔAME** | **90% confidence interval** | **p-value** | **Decision** |
| --- | --- | --- | --- | --- | --- | --- | --- |
| Tie formation | Local closure | -0.0008 | -0.0019 | -0.0011 | [-0.00112, -0.00105]⊂ [-0.10, 0.10] | 3.36e-4500286 (<0.001) | Pass |
| Tie formation | Centrality level | 0.0291 | 0.0296 | 0.0005 | [-0.00027, 0.00124]⊂ [-0.10, 0.10] | 4.45e-10278 (<0.001) | Pass |
| Tie formation | Centrality difference | -0.0013 | -0.0040 | -0.0027 | [-0.00278, -0.00263]⊂ [-0.10, 0.10] | 4.47e-1021098 (<0.001) | Pass |
| Tie formation | Technological scale level | -0.0067 | -0.0092 | -0.0025 | [-0.00270, -0.00229]⊂ [-0.10, 0.10] | 5.22e-133224 (<0.001) | Pass |
| Tie formation | Technological scale difference | 0.0145 | 0.0163 | 0.0018 | [0.00141, 0.00220]⊂ [-0.10, 0.10] | 3.06e-36432 (<0.001) | Pass |
| Tie formation | Technological proximity | 0.0131 | 0.0101 | -0.0029 | [-0.00324, -0.00263]⊂ [-0.10, 0.10] | 6.32e-60235 (<0.001) | Pass |
| Tie formation | Historical ties | 0.0279 | 0.0249 | -0.0031 | [-0.00375, -0.00239]⊂ [-0.10, 0.10] | 4.19e-11883 (<0.001) | Pass |
| Tie persistence | Local closure | 0.0000 | 0.0023 | 0.0023 | [0.00218, 0.00236]⊂ [-0.10, 0.10] | 1.18e-756566 (<0.001) | Pass |
| Tie persistence | Centrality level | 0.1042 | 0.1099 | 0.0057 | [-0.00021, 0.01162]⊂ [-0.10, 0.10] | 9.95e-152 (<0.001) | Pass |
| Tie persistence | Centrality difference | -0.0582 | -0.0619 | -0.0037 | [-0.00703, -0.00039]⊂ [-0.10, 0.10] | 5.47e-497 (<0.001) | Pass |
| Tie persistence | Technological scale level | -0.0564 | -0.0625 | -0.0061 | [-0.00937, -0.00280]⊂ [-0.10, 0.10] | 1.30e-482 (<0.001) | Pass |
| Tie persistence | Technological scale difference | 0.0746 | 0.0771 | 0.0024 | [-0.00175, 0.00664]⊂ [-0.10, 0.10] | 1.71e-320 (<0.001) | Pass |
| Tie persistence | Technological proximity | -0.0049 | -0.0105 | -0.0055 | [-0.00599, -0.00510]⊂ [-0.10, 0.10] | 4.00e-26572 (<0.001) | Pass |
| Tie persistence | Historical ties | 0.0813 | 0.0861 | 0.0048 | [0.00015, 0.00941]⊂ [-0.10, 0.10] | 1.60e-251 (<0.001) | Pass |

Table 4. Edge-Threshold Test: Detailed Results for the Main-Specification and Edge-Threshold Control Groups

| **Process** | **Mechanism** | **Baseline AME** | **Comparison AME** | **ΔAME** | **90% confidence interval** | **p-value** | **Decision** |
| --- | --- | --- | --- | --- | --- | --- | --- |
| Tie formation | Local closure | -0.0008 | 0.0379 | 0.0387 | [0.03827, 0.03906]⊂ [-0.10, 0.10] | 7.72e-14198 (<0.001) | Pass |
| Tie formation | Centrality level | 0.0291 | 0.0832 | 0.0541 | [0.05303, 0.05508]⊂ [-0.10, 0.10] | 9.76e-1182 (<0.001) | Pass |
| Tie formation | Centrality difference | -0.0013 | 0.0179 | 0.0192 | [0.01898, 0.01936]⊂ [-0.10, 0.10] | 5.94e-109075 (<0.001) | Pass |
| Tie formation | Technological scale level | -0.0067 | 0.0024 | 0.0091 | [0.00902, 0.00927]⊂ [-0.10, 0.10] | 1.24e-287585 (<0.001) | Pass |
| Tie formation | Technological scale difference | 0.0145 | 0.0266 | 0.0121 | [0.01169, 0.01247]⊂ [-0.10, 0.10] | 3.27e-29880 (<0.001) | Pass |
| Tie formation | Technological proximity | 0.0131 | 0.0269 | 0.0138 | [0.01344, 0.01419]⊂ [-0.10, 0.10] | 9.89e-31329 (<0.001) | Pass |
| Tie formation | Historical ties | 0.0279 | 0.0547 | 0.0268 | [0.02601, 0.02756]⊂ [-0.10, 0.10] | 1.11e-5225 (<0.001) | Pass |
| Tie persistence | Local closure | 0.0000 | -0.0025 | -0.0025 | [-0.00259, -0.00247]⊂ [-0.10, 0.10] | 4.35e-1699797 (<0.001) | Pass |
| Tie persistence | Centrality level | 0.1042 | 0.1499 | 0.0457 | [0.04032, 0.05113]⊂ [-0.10, 0.10] | 1.39e-61 (<0.001) | Pass |
| Tie persistence | Centrality difference | -0.0582 | -0.0404 | 0.0179 | [0.01534, 0.02038]⊂ [-0.10, 0.10] | 3.25e-627 (<0.001) | Pass |
| Tie persistence | Technological scale level | -0.0564 | -0.0473 | 0.0091 | [0.00661, 0.01164]⊂ [-0.10, 0.10] | 4.45e-769 (<0.001) | Pass |
| Tie persistence | Technological scale difference | 0.0746 | 0.0716 | -0.0030 | [-0.00643, 0.00041]⊂ [-0.10, 0.10] | 2.80e-475 (<0.001) | Pass |
| Tie persistence | Technological proximity | -0.0049 | 0.0122 | 0.0171 | [0.01678, 0.01746]⊂ [-0.10, 0.10] | 1.31e-34830 (<0.001) | Pass |
| Tie persistence | Historical ties | 0.0813 | 0.1664 | 0.0851 | [0.08013, 0.09013]⊂ [-0.10, 0.10] | 4.97e-7 (<0.001) | Pass |

Table 5. Raw-Boundary Comparison: Detailed Results for the Main-Specification and Unscreened Groups

| **Process** | **Mechanism** | **Baseline AME** | **Comparison AME** | **ΔAME** | **90% confidence interval** | **p-value** | **Decision** |
| --- | --- | --- | --- | --- | --- | --- | --- |
| Tie formation | Local closure | -0.0008 | 0.0082 | 0.0089 | [0.00889, 0.00901]⊂ [-0.10, 0.10] | 4.83e-1230748 (<0.001) | Pass |
| Tie formation | Centrality level | 0.0291 | 0.0204 | -0.0087 | [-0.00924, -0.00810]⊂ [-0.10, 0.10] | 2.58e-15035 (<0.001) | Pass |
| Tie formation | Centrality difference | -0.0013 | 0.0014 | 0.0027 | [0.00265, 0.00270]⊂ [-0.10, 0.10] | 4.47e-7791667 (<0.001) | Pass |
| Tie formation | Technological scale level | -0.0067 | 0.0051 | 0.0118 | [0.01167, 0.01194]⊂ [-0.10, 0.10] | 4.56e-258573 (<0.001) | Pass |
| Tie formation | Technological scale difference | 0.0145 | 0.0019 | -0.0126 | [-0.01292, -0.01237]⊂ [-0.10, 0.10] | 1.26e-59390 (<0.001) | Pass |
| Tie formation | Technological proximity | 0.0131 | 0.0048 | -0.0083 | [-0.00855, -0.00806]⊂ [-0.10, 0.10] | 1.66e-79348 (<0.001) | Pass |
| Tie formation | Historical ties | 0.0279 | 0.0100 | -0.0180 | [-0.01850, -0.01743]⊂ [-0.10, 0.10] | 5.35e-13918 (<0.001) | Pass |
| Tie persistence | Local closure | 0.0000 | 0.0560 | 0.0560 | [0.05542, 0.05659]⊂ [-0.10, 0.10] | 1.19e-3312 (<0.001) | Pass |
| Tie persistence | Centrality level | 0.1042 | 0.1419 | 0.0376 | [0.03319, 0.04210]⊂ [-0.10, 0.10] | 1.73e-117 (<0.001) | Pass |
| Tie persistence | Centrality difference | -0.0582 | 0.0354 | 0.0936 | [0.09126, 0.09601]⊂ [-0.10, 0.10] | 5.26e-6 (<0.001) | Pass |
| Tie persistence | Technological scale level | -0.0564 | -0.0210 | 0.0354 | [0.03314, 0.03771]⊂ [-0.10, 0.10] | 3.07e-471 (<0.001) | Pass |
| Tie persistence | Technological scale difference | 0.0746 | 0.0185 | -0.0561 | [-0.05911, -0.05308]⊂ [-0.10, 0.10] | 5.33e-127 (<0.001) | Pass |
| Tie persistence | Technological proximity | -0.0049 | 0.0102 | 0.0151 | [0.01489, 0.01534]⊂ [-0.10, 0.10] | 6.64e-83164 (<0.001) | Pass |
| Tie persistence | Historical ties | 0.081 | 0.177 | 0.096 | [0.092, 0.100]⊂ [-0.10, 0.10] | 0.0453 (<0.001) | Pass |

Table 6. Detailed Assessment of Substantive Sign Reversals in the Frequency-Criterion Test

| **Process** | **Mechanism** | **Baseline β** | **Comparison β** | **Δβ** | **Baseline p-value** | **Comparison p-value** | **Sign relationship** | **Numerical basis for no substantive reversal** | **Directional assessment** |
| --- | --- | --- | --- | --- | --- | --- | --- | --- | --- |
| Tie formation | Local closure | -0.017 | 0.006 | 0.023 | 0.851 | 0.951 | Opposite signs | β_baseline < 0.20; β_comparison < 0.20; p_baseline ≥ 0.10; p_comparison ≥ 0.10; Δβ ≤0.50 | No substantive sign reversal |
| Tie formation | Centrality level | 0.647 | 0.655 | 0.008 | 2.94e-13 (<0.001) | 8.52e-14 (<0.001) | Same direction | Coefficients have the same sign | No substantive sign reversal |
| Tie formation | Centrality difference | -0.029 | 0.117 | 0.146 | 0.779 | 0.212 | Opposite signs | β_baseline < 0.20; β_comparison < 0.20; p_baseline ≥ 0.10; p_comparison ≥ 0.10; Δβ ≤0.50 | No substantive sign reversal |
| Tie formation | Technological scale level | -0.150 | 0.045 | 0.195 | 0.031 | 0.505 | Opposite signs | β_baseline < 0.20; β_comparison < 0.20; p_comparison ≥ 0.10; Δβ ≤0.50 | No substantive sign reversal |
| Tie formation | Technological scale difference | 0.323 | 0.084 | -0.238 | 4.57e-05 (<0.001) | 0.155 | Same direction | Coefficients have the same sign | No substantive sign reversal |
| Tie formation | Technological proximity | 0.291 | 0.279 | -0.011 | 5.81e-06 (<0.001) | 1.01e-05 (<0.001) | Same direction | Coefficients have the same sign | No substantive sign reversal |
| Tie formation | Historical ties | 0.621 | 0.651 | 0.030 | 7.06e-85 (<0.001) | 1.05e-100 (<0.001) | Same direction | Coefficients have the same sign | No substantive sign reversal |
| Tie persistence | Local closure | 0.000 | 0.065 | 0.065 | 1.000 | 0.757 | Same direction | Coefficients have the same sign | No substantive sign reversal |
| Tie persistence | Centrality level | 0.937 | 0.874 | -0.062 | 2.37e-06 (<0.001) | 6.28e-06 (<0.001) | Same direction | Coefficients have the same sign | No substantive sign reversal |
| Tie persistence | Centrality difference | -0.523 | -0.330 | 0.193 | 0.131 | 0.311 | Same direction | Coefficients have the same sign | No substantive sign reversal |
| Tie persistence | Technological scale level | -0.507 | -0.450 | 0.057 | 3.71e-04 (<0.001) | 9.22e-04 (<0.001) | Same direction | Coefficients have the same sign | No substantive sign reversal |
| Tie persistence | Technological scale difference | 0.671 | 0.476 | -0.195 | 0.002 | 0.016 | Same direction | Coefficients have the same sign | No substantive sign reversal |
| Tie persistence | Technological proximity | -0.044 | -0.026 | 0.018 | 0.646 | 0.773 | Same direction | Coefficients have the same sign | No substantive sign reversal |
| Tie persistence | Historical ties | 0.731 | 0.718 | -0.012 | 3.32e-05 (<0.001) | 2.05e-05 (<0.001) | Same direction | Coefficients have the same sign | No substantive sign reversal |

Table 7. Detailed Assessment of Substantive Sign Reversals in the Active-Period Criterion Test

| **Process** | **Mechanism** | **Baseline β** | **Comparison β** | **Δβ** | **Baseline p-value** | **Comparison p-value** | **Sign relationship** | **Numerical basis for no substantive reversal** | **Directional assessment** |
| --- | --- | --- | --- | --- | --- | --- | --- | --- | --- |
| Tie formation | Local closure | -0.017 | -0.047 | -0.029 | 0.851 | 0.597 | Same direction | Coefficients have the same sign | No substantive sign reversal |
| Tie formation | Centrality level | 0.647 | 0.740 | 0.093 | 2.94e-13 (<0.001) | 1.85e-17 (<0.001) | Same direction | Coefficients have the same sign | No substantive sign reversal |
| Tie formation | Centrality difference | -0.029 | -0.100 | -0.071 | 0.779 | 0.310 | Same direction | Coefficients have the same sign | No substantive sign reversal |
| Tie formation | Technological scale level | -0.150 | -0.231 | -0.081 | 0.031 | 6.41e-04 (<0.001) | Same direction | Coefficients have the same sign | No substantive sign reversal |
| Tie formation | Technological scale difference | 0.323 | 0.408 | 0.086 | 4.57e-05 (<0.001) | 2.93e-08 (<0.001) | Same direction | Coefficients have the same sign | No substantive sign reversal |
| Tie formation | Technological proximity | 0.291 | 0.254 | -0.037 | 5.81e-06 (<0.001) | 3.26e-05 (<0.001) | Same direction | Coefficients have the same sign | No substantive sign reversal |
| Tie formation | Historical ties | 0.621 | 0.622 | 0.001 | 7.06e-85 (<0.001) | 1.17e-91 (<0.001) | Same direction | Coefficients have the same sign | No substantive sign reversal |
| Tie persistence | Local closure | 0.000 | 0.020 | 0.020 | 1.000 | 0.921 | Same direction | Coefficients have the same sign | No substantive sign reversal |
| Tie persistence | Centrality level | 0.937 | 0.991 | 0.055 | 2.37e-06 (<0.001) | 2.55e-07 (<0.001) | Same direction | Coefficients have the same sign | No substantive sign reversal |
| Tie persistence | Centrality difference | -0.523 | -0.559 | -0.035 | 0.131 | 0.093 | Same direction | Coefficients have the same sign | No substantive sign reversal |
| Tie persistence | Technological scale level | -0.507 | -0.564 | -0.057 | 3.71e-04 (<0.001) | 3.06e-05 (<0.001) | Same direction | Coefficients have the same sign | No substantive sign reversal |
| Tie persistence | Technological scale difference | 0.671 | 0.695 | 0.024 | 0.002 | 9.26e-04 (<0.001) | Same direction | Coefficients have the same sign | No substantive sign reversal |
| Tie persistence | Technological proximity | -0.044 | -0.094 | -0.050 | 0.646 | 0.302 | Same direction | Coefficients have the same sign | No substantive sign reversal |
| Tie persistence | Historical ties | 0.731 | 0.777 | 0.046 | 3.32e-05 (<0.001) | 1.06e-05 (<0.001) | Same direction | Coefficients have the same sign | No substantive sign reversal |

Table 8. Detailed Assessment of Substantive Sign Reversals in the Edge-Threshold Test

| **Process** | **Mechanism** | **Baseline β** | **Comparison β** | **Δβ** | **Baseline p-value** | **Comparison p-value** | **Sign relationship** | **Numerical basis for no substantive reversal** | **Directional assessment** |
| --- | --- | --- | --- | --- | --- | --- | --- | --- | --- |
| Tie formation | Local closure | -0.017 | 0.389 | 0.406 | 0.851 | 1.43e-09 (<0.001) | Opposite signs | β_baseline < 0.20; p_baseline ≥ 0.10; Δβ ≤0.50 | No substantive sign reversal |
| Tie formation | Centrality level | 0.647 | 0.853 | 0.206 | 2.94e-13 (<0.001) | 7.76e-24 (<0.001) | Same direction | Coefficients have the same sign | No substantive sign reversal |
| Tie formation | Centrality difference | -0.029 | 0.183 | 0.212 | 0.779 | 0.093 | Opposite signs | β_baseline < 0.20; β_comparison < 0.20; p_baseline ≥ 0.10; Δβ ≤0.50 | No substantive sign reversal |
| Tie formation | Technological scale level | -0.150 | 0.025 | 0.175 | 0.031 | 0.553 | Opposite signs | β_baseline < 0.20; β_comparison < 0.20; p_comparison ≥ 0.10; Δβ ≤0.50 | No substantive sign reversal |
| Tie formation | Technological scale difference | 0.323 | 0.273 | -0.050 | 4.57e-05 (<0.001) | 1.03e-05 (<0.001) | Same direction | Coefficients have the same sign | No substantive sign reversal |
| Tie formation | Technological proximity | 0.291 | 0.276 | -0.015 | 5.81e-06 (<0.001) | 5.03e-14 (<0.001) | Same direction | Coefficients have the same sign | No substantive sign reversal |
| Tie formation | Historical ties | 0.621 | 0.561 | -0.060 | 7.06e-85 (<0.001) | 2.49e-21 (<0.001) | Same direction | Coefficients have the same sign | No substantive sign reversal |
| Tie persistence | Local closure | 0.000 | -0.019 | -0.019 | 1.000 | 0.883 | Opposite signs | β_baseline < 0.20; β_comparison < 0.20; p_baseline ≥ 0.10; p_comparison ≥ 0.10; Δβ ≤0.50 | No substantive sign reversal |
| Tie persistence | Centrality level | 0.937 | 1.100 | 0.164 | 2.37e-06 (<0.001) | 2.39e-14 (<0.001) | Same direction | Coefficients have the same sign | No substantive sign reversal |
| Tie persistence | Centrality difference | -0.523 | -0.296 | 0.227 | 0.131 | 0.154 | Same direction | Coefficients have the same sign | No substantive sign reversal |
| Tie persistence | Technological scale level | -0.507 | -0.347 | 0.160 | 3.71e-04 (<0.001) | 1.56e-06 (<0.001) | Same direction | Coefficients have the same sign | No substantive sign reversal |
| Tie persistence | Technological scale difference | 0.671 | 0.526 | -0.145 | 0.002 | 5.84e-05 (<0.001) | Same direction | Coefficients have the same sign | No substantive sign reversal |
| Tie persistence | Technological proximity | -0.044 | 0.089 | 0.134 | 0.646 | 0.049 | Opposite signs | β_baseline < 0.20; β_comparison < 0.20; p_baseline ≥ 0.10; Δβ ≤0.50 | No substantive sign reversal |
| Tie persistence | Historical ties | 0.731 | 1.221 | 0.491 | 3.32e-05 (<0.001) | 3.89e-12 (<0.001) | Same direction | Coefficients have the same sign | No substantive sign reversal |

Table 9. Detailed Assessment of Substantive Sign Reversals in the Raw-Boundary Comparison

| **Process** | **Mechanism** | **Baseline β** | **Comparison β** | **Δβ** | **Baseline p-value** | **Comparison p-value** | **Sign relationship** | **Numerical basis for no substantive reversal** | **Directional assessment** |
| --- | --- | --- | --- | --- | --- | --- | --- | --- | --- |
| Tie formation | Local closure | -0.017 | 0.483 | 0.500 | 0.851 | 8.39e-33 (<0.001) | Opposite signs | β_baseline < 0.20; p_baseline ≥ 0.10 | No substantive sign reversal |
| Tie formation | Centrality level | 0.647 | 1.208 | 0.561 | 2.94e-13 (<0.001) | 1.01e-61 (<0.001) | Same direction | Coefficients have the same sign | No substantive sign reversal |
| Tie formation | Centrality difference | -0.029 | 0.081 | 0.110 | 0.779 | 0.291 | Opposite signs | β_baseline < 0.20; β_comparison < 0.20; p_baseline ≥ 0.10; p_comparison ≥ 0.10; Δβ ≤0.50 | No substantive sign reversal |
| Tie formation | Technological scale level | -0.150 | 0.299 | 0.449 | 0.031 | 2.04e-20 (<0.001) | Opposite signs | β_baseline < 0.20; Δβ ≤0.50 | No substantive sign reversal |
| Tie formation | Technological scale difference | 0.323 | 0.111 | -0.212 | 4.57e-05 (<0.001) | 5.35e-06 (<0.001) | Same direction | Coefficients have the same sign | No substantive sign reversal |
| Tie formation | Technological proximity | 0.291 | 0.282 | -0.009 | 5.81e-06 (<0.001) | 1.16e-35 (<0.001) | Same direction | Coefficients have the same sign | No substantive sign reversal |
| Tie formation | Historical ties | 0.621 | 0.589 | -0.032 | 7.06e-85 (<0.001) | 9.18e-35 (<0.001) | Same direction | Coefficients have the same sign | No substantive sign reversal |
| Tie persistence | Local closure | 0.000 | 0.340 | 0.339 | 1.000 | 4.29e-06 (<0.001) | Same direction | Coefficients have the same sign | No substantive sign reversal |
| Tie persistence | Centrality level | 0.937 | 0.860 | -0.077 | 2.37e-06 (<0.001) | 1.61e-11 (<0.001) | Same direction | Coefficients have the same sign | No substantive sign reversal |
| Tie persistence | Centrality difference | -0.523 | 0.215 | 0.738 | 0.131 | 0.101 | Opposite signs | p_baseline ≥ 0.10; p_comparison ≥ 0.10 | No substantive sign reversal |
| Tie persistence | Technological scale level | -0.507 | -0.127 | 0.380 | 3.71e-04 (<0.001) | 0.017 | Same direction | Coefficients have the same sign | No substantive sign reversal |
| Tie persistence | Technological scale difference | 0.671 | 0.112 | -0.558 | 0.002 | 0.080 | Same direction | Coefficients have the same sign | No substantive sign reversal |
| Tie persistence | Technological proximity | -0.044 | 0.062 | 0.106 | 0.646 | 0.020 | Opposite signs | β_baseline < 0.20; β_comparison < 0.20; p_baseline ≥ 0.10; Δβ ≤0.50 | No substantive sign reversal |
| Tie persistence | Historical ties | 0.731 | 1.076 | 0.345 | 3.32e-05 (<0.001) | 2.42e-14 (<0.001) | Same direction | Coefficients have the same sign | No substantive sign reversal |

Table 10. Summary of Stability Tests Using the Controlled-Variable Design

| **Comparison** | **Test design** | **Items passing** | **No substantive sign reversal** | **Substantive sign reversal** |
| --- | --- | --- | --- | --- |
| Frequency-criterion test | Holding the active-period and edge thresholds constant, only the requirement of at least 40 total occurrences is removed. | 14/14 | 14/14 | 0 |
| Active-period criterion test | Holding the total-frequency and edge thresholds constant, only the requirement of activity in at least four periods is removed. | 14/14 | 14/14 | 0 |
| Edge-threshold test | Holding the node-screening criteria constant, the edge definition is relaxed from at least three co-occurrences to at least one. | 14/14 | 14/14 | 0 |
| Raw-boundary comparison | All three screening criteria are removed simultaneously to compare the unrestricted boundary with the main specification. | 14/14 | 14/14 | 0 |

**4 Interpretation of Results and Statistical Basis for Threshold Selection**

Regarding node-screening criteria, both the frequency-threshold and active-period tests show that node-screening rules do not alter the model's core mechanism-level conclusions. When only the total-frequency threshold is removed, all 14 mechanisms across tie formation and tie persistence pass the AME-TOST equivalence tests, and no substantive sign reversal occurs. This indicates that requiring a technology to appear at least 40 times primarily removes low-frequency, incidental, and insufficiently representative peripheral nodes without systematically changing the direction of each mechanism's effect on formation or persistence probabilities. In other words, frequency screening reduces incidental noise in the network, whereas the structural, node-capability, and relational-foundation mechanisms identified by the model do not depend on the frequency threshold itself.

The active-period threshold test yields a similar conclusion. After removing only the requirement that a technology appear in at least four observation periods, all 14 mechanisms continue to pass the equivalence tests, with no substantive sign reversal. This shows that screening by the number of active periods mainly retains technology nodes with meaningful cross-period observability and improves comparability among networks from different periods. Including all short-lived technology nodes broadens node coverage but does not substantively affect the core mechanism-level conclusions. The active-period threshold is therefore not a key source driving the model results; rather, it supports the stability and interpretability of cross-period technology-network construction.

Regarding the edge-binarization threshold, all 14 mechanisms in the formation and persistence processes also pass the equivalence tests when the definition of a valid edge is relaxed from at least three co-occurrences to at least one. Thus, even when one-off co-occurrence relationships are included, the differences in average marginal effects remain within the prespecified equivalence bounds, and the core mechanisms do not change substantively. The edge threshold mainly affects the extent to which weak ties are retained, without altering the model's overall conclusions concerning the formation and continuation of technological coordination.

The unrestricted raw-boundary comparison further confirms these findings. When the total-frequency threshold, the active-period threshold, and the edge-binarization threshold are all removed simultaneously, all 14 mechanisms still pass the AME-TOST equivalence tests, and none exhibits a substantive sign reversal. Even under the broadest data boundary, the main mechanisms identified by the model remain consistent with those obtained from the main specification. The empirical findings are therefore not driven by any particular screening criterion or threshold combination.

Taken together, the three single-factor perturbation tests and the unrestricted raw-boundary comparison show that the core conclusions are robust to node screening and edge-threshold settings. Across the four comparisons, the 90% confidence intervals for all mechanisms lie entirely within the ±0.10 equivalence bounds, and all AME-TOST results satisfy the 0.05 significance criterion. In addition, no mechanism exhibits a substantive sign reversal under any alternative setting. The requirements that a technology appear at least 40 times, remain active in at least four periods, and co-occur at least three times to constitute an edge therefore primarily reduce noise, compress the risk set, and improve cross-period comparability; they do not systematically bias the mechanisms of tie formation or tie persistence. The main conclusions concerning the evolutionary mechanisms of the core technology association network in the low-altitude economy demonstrate strong threshold robustness and empirical reliability.

**References**

[1] LONG X F, HU S H, LIAO W Z, et al. Spatial evolution characteristics and influencing factors of China's low-altitude economy innovation network [J]. Economic Geography, 2026, 46(3): 12-23. DOI: 10.15957/j.cnki.jjdl.2026.03.002. (in Chinese)

[2] MOHAMMADI N, HEIDARY DAHOOIE J, BENGARI A A, et al. Mapping the technological evolution of generative AI: a patent network analysis [J]. Scientific Reports, 2025, 15: 45690. DOI: 10.1038/s41598-025-26810-7.

[3] GAO Y, ZHU Z, KALI R, RICCABONI M. Community evolution in patent networks: technological change and network dynamics [J]. Applied Network Science, 2018, 3(1): 26. DOI: 10.1007/s41109-018-0090-3.

[4] SON S, CHO N W. Technology fusion characteristics in the solar photovoltaic industry of South Korea: A patent network analysis using IPC co-occurrence [J]. Sustainability, 2020, 12(21): 9084. DOI: 10.3390/su12219084.

[5] TANG Y, LOU X, CHEN Z, ZHANG C. A study on dynamic patterns of technology convergence with IPC co-occurrence-based analysis: The case of 3D printing [J]. Sustainability, 2020, 12(7): 2655. DOI: 10.3390/su12072655.

[6] YANG G, XING J, XU S, ZHAO Y. A framework armed with node dynamics for predicting technology convergence [J]. Journal of Informetrics, 2024, 18(4): 101583. DOI: 10.1016/j.joi.2024.101583.

[7] PUY A, ROY P T, SALTELLI A. Discrepancy measures for global sensitivity analysis [J]. Technometrics, 2024, 66(3): 347-357. DOI: 10.1080/00401706.2024.2304341.

[8] LONG J S, MUSTILLO S A. Using predictions and marginal effects to compare groups in regression models for binary outcomes [J]. Sociological Methods & Research, 2021, 50(3): 1284-1320. DOI: 10.1177/0049124118799374.

[9] YIN G H, DONG Z Y, AMUJILITE, et al. The margins model and its application to interaction analysis in epidemiology [J]. Journal of Environmental Hygiene, 2025, 15(9): 786-791. DOI: 10.13421/j.cnki.hjwsxzz.2025.09.005. (in Chinese)

[10] WILLIAMS R. Using the margins command to estimate and interpret adjusted predictions and marginal effects [J]. The Stata Journal, 2012, 12(2): 308-331. DOI: 10.1177/1536867X1201200209.

[11] LAKENS D. Equivalence tests: a practical primer for t tests, correlations, and meta-analyses [J]. Social Psychological and Personality Science, 2017, 8(4): 355-362. DOI: 10.1177/1948550617697177.

[12] COHEN J. Statistical Power Analysis for the Behavioral Sciences [M]. 2nd ed. Hillsdale: Lawrence Erlbaum Associates, 1988.

[13] SCHUIRMANN D J. A comparison of the two one-sided tests procedure and the power approach for assessing the equivalence of average bioavailability [J]. Journal of Pharmacokinetics and Biopharmaceutics, 1987, 15(6): 657-680. DOI: 10.1007/BF01068419.

[14] WELLEK S. Testing Statistical Hypotheses of Equivalence and Noninferiority [M]. 2nd ed. New York: Chapman and Hall/CRC, 2010.

[15] WASSERSTEIN R L, SCHIRM A L, LAZAR N A. Moving to a world beyond “p < 0.05” [J]. The American Statistician, 2019, 73(sup1): 1-19. DOI: 10.1080/00031305.2019.1583913.

[16] CUMMING G. The new statistics: why and how [J]. Psychological Science, 2014, 25(1): 7-29. DOI: 10.1177/0956797613504966.

[17] SULLIVAN G M, FEINN R. Using effect size-or why the P value is not enough [J]. Journal of Graduate Medical Education, 2012, 4(3): 279-282. DOI: 10.4300/JGME-D-12-00156.1.
